# Supplementary material
Source: HighWire-hosted journal article supplement (doi:10.1101/rna.079779.123)
Supplement: Supplemental_Material.pdf [file Supplemental_Material.pdf]

# **Direct and Indirect Control of Rho-Dependent Transcription Termination by the *Escherichia coli lysC* Riboswitch**

**T. Ghosh<sup>1</sup>, S. Jahangirnejad<sup>1</sup>, A. Chauvier<sup>1&</sup>, A.M. Stringer<sup>2</sup>, A.P. Korepanov<sup>4</sup>, J.P. Côté<sup>1</sup>, J.T. Wade<sup>2,3\*</sup> and D.A. Lafontaine<sup>1\*</sup>**

<sup>1</sup>Department of Biology, Faculty of Science, RNA Group, Université de Sherbrooke, Sherbrooke, Quebec, Canada, J1K 2R1.

<sup>2</sup>Wadsworth Center, New York State Department of Health, Albany, NY 12208, USA.

<sup>3</sup>Department of Biomedical Sciences, University at Albany, Albany, NY 12201, USA.

<sup>4</sup>Expression Génétique Microbienne, UMR8261 CNRS, Université Paris Cité, Institut de Biologie Physico-Chimique, 75005 Paris, France.

&Present address: Single Molecule Analysis Group, Department of Chemistry, University of Michigan, Ann Arbor, MI 48109.

\*Corresponding authors: joseph.wade@health.ny.gov and daniel.lafontaine@usherbrooke.ca

Short title: Direct and Indirect Control of the *lysC* Riboswitch

Keywords: Riboswitch, lysine, Rho transcription termination, reporter gene assays.

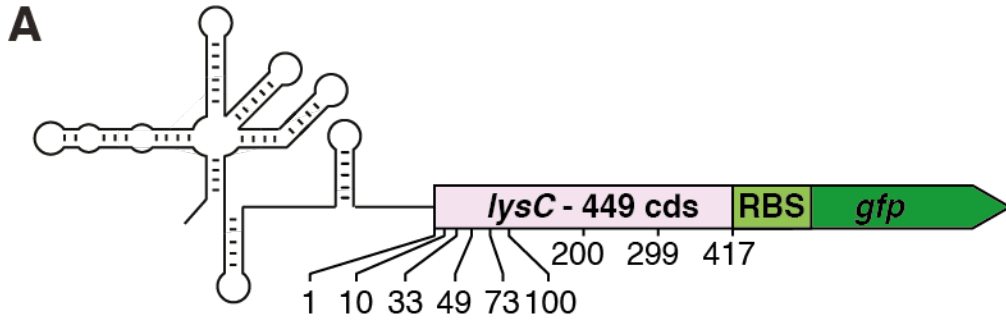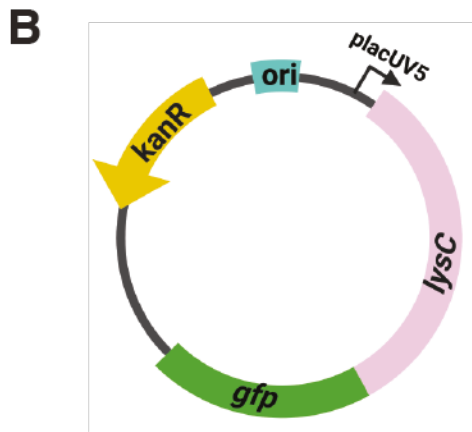

**Supplemental Figure S1. Schematics of the constructs used in this study.**

(A) Transcriptional *lysC-gfp* fusions used for reporter gene assays. The various lengths used in this study are shown. The presence of the ribosome binding site (RBS) of *gfp* allows the construct to report mRNA levels and not to be directly modulated by the translational regulation of the riboswitch.

(B) Schematic of the plasmid used to express the transcriptional *lysC-gfp* fusions.

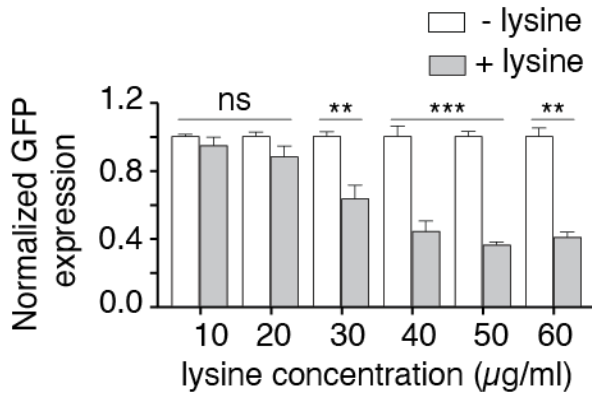

**Supplemental Figure S2. Expression of transcriptional *lysC-gfp* fusion performed in the absence and the presence of various concentrations of lysine.**

The construct used in this experiment contained 417 codons of *lysC*. Values were normalized to the expression obtained without lysine for each construct. The average values of three independent experiments with SD are shown. Two and three asterisks indicate the p-value of <0.01 and <0.001, respectively, and NS stands for non-significant.

**Supplemental Table S1. Summary of strains or plasmids used in this study.**

| <b>Strains</b>                    |                                                                                        |                                                         |
|-----------------------------------|----------------------------------------------------------------------------------------|---------------------------------------------------------|
| <b>Strain name</b>                | <b>Characteristics</b>                                                                 | <b>References</b>                                       |
| EM1055                            | WT strain- MG1655 $\Delta$ lacX74                                                      | Caron <i>et al.</i> , 2012 (Caron <i>et al.</i> 2012)   |
| EM1377                            | EM1055 <i>me-131 zce-726::Tn10</i>                                                     | Caron <i>et al.</i> , 2012 (Caron <i>et al.</i> 2012)   |
| 137AML                            | EM1055, placUV5 <i>lysC</i> 308 nt <i>lacZ</i> (transcriptional fusion)                | This study                                              |
| 138AML                            | EM1377 <i>me-131</i> , placUV5 <i>lysC</i> 308 nt <i>lacZ</i> (transcriptional fusion) | This study                                              |
| CRB016                            | MG1655 <i>rho</i> -R66S <i>ilv-500::Tn10</i>                                           | Bastet <i>et al.</i> , 2017 (Bastet <i>et al.</i> 2017) |
| OK580                             | MG1655 $\Delta$ lacX74 <i>mal::lac<sup>R</sup> rho-35::IS1</i>                         |                                                         |
| OK752                             | MG1655 $\Delta$ lacX74 <i>mal::lac<sup>R</sup> rho</i> -R66S <i>ilv-500::Tn10</i>      | This study                                              |
| OK756                             | MG1655 $\Delta$ lacX74 <i>mal::lac<sup>R</sup> rho</i> -R66S                           | This study                                              |
| <b>Plasmids</b>                   |                                                                                        |                                                         |
| <b>Plasmid name</b>               | <b>Characteristics</b>                                                                 | <b>References</b>                                       |
| pBAD <i>lysC</i> -WT              | pBAD24/ <i>lysC</i> (arabinose inducible promoter)                                     | Caron <i>et al.</i> , 2012 (Caron <i>et al.</i> 2012)   |
| pBAD <i>lysC</i> - $\Delta$ Site1 | pBAD24/ <i>lysC</i> - $\Delta$ Site1 (arabinose inducible promoter)                    | Caron <i>et al.</i> , 2012 (Caron <i>et al.</i> 2012)   |
| pUA66/pbpg-GFP                    | pUC101 ori, KanR                                                                       | Alon collection (Zaslaver <i>et al.</i> 2006)           |
| pTG268                            | pUA66/placUV5-RBS-GFP                                                                  | This study                                              |
| pTG289                            | pUA66/placUV5- <i>lysC</i> 1cd-RBS-GFP                                                 | This study                                              |
| pTG273                            | pUA66/placUV5- <i>lysC</i> 10cd-RBS-GFP                                                | This study                                              |
| pTG290                            | pUA66/placUV5- <i>lysC</i> 30cd-RBS-GFP                                                | This study                                              |
| pTG274                            | pUA66/placUV5- <i>lysC</i> 50cd-RBS-GFP                                                | This study                                              |
| pTG275                            | pUA66/placUV5- <i>lysC</i> 75cd-RBS-GFP                                                | This study                                              |
| pTG257                            | pUA66/placUV5- <i>lysC</i> 100cd-RBS-GFP                                               | This study                                              |
| pTG276                            | pUA66/placUV5- <i>lysC</i> 200cd-RBS-GFP                                               | This study                                              |
| pTG277                            | pUA66/placUV5- <i>lysC</i> 300cd-RBS-GFP                                               | This study                                              |
| pTG278                            | pUA66/placUV5- <i>lysC</i> 400cd-RBS-GFP                                               | This study                                              |
| pTG377                            | pUA66/placUV5- <i>lysC</i> $\Delta$ Site1 1cd-RBS-GFP                                  |                                                         |

**Supplemental Table S2. Summary of oligonucleotides used in this study.**

| Name                                   | Sequence 5'-3'                                                            | Use                                                       |
|----------------------------------------|---------------------------------------------------------------------------|-----------------------------------------------------------|
| Fwd LacUV5-lysC                        | GGGCACCCCAGGCTTTACACTTTATGCTTCCGGCTCGTATAATG<br>TGTGGGTACTACCTGCGCTAGCGCA | <i>lysC</i> -GFP fusion construct,<br>common forward      |
| Rev <i>lysC</i> 100nt                  | GCACGTTGGCATCAGAAAGCACAATATC                                              | PCR product for <i>in vitro</i><br>transcription, reverse |
| Probe <i>lysC</i> P1                   | CGCGCCTCTTCTGG                                                            |                                                           |
| Rev <i>lysC</i> 1cd-RBS-<br>GFP        | CTCCTTCTTAAATCTAGAGGATCCCATAACTACCTCGTGTGATCC<br>GGATCC                   | pTG289 and pTG377<br>construct, reverse                   |
| Rev <i>lysC</i> 10cd-RBS-<br>GFP       | CTCCTTCTTAAATCTAGAGGATCCGCCAAATTTGGAGACAACAA<br>TTTCAGACATAAC             | pTG273 construct, reverse                                 |
| Rev <i>lysC</i> 30cd-RBS-<br>GFP       | CTCCTTCTTAAATCTAGAGGATCCGCACGTTGGCATCAGAAAGC<br>AC                        | pTG290 construct, reverse                                 |
| Rev <i>lysC</i> 50cd-RBS-<br>GFP       | CTCCTTCTTAAATCTAGAGGATCCGACCAGCAGATTAGTGATAC<br>CAGCAG                    | pTG274 construct, reverse                                 |
| Rev <i>lysC</i> 75cd-RBS-<br>GFP       | CTCCTTCTTAAATCTAGAGGATCCGGCAAACCTGGATGTTGCGGA<br>TAGC                     | pTG275 construct, reverse                                 |
| Rev <i>lysC</i> 100cd-RBS-<br>GFP      | CTCCTTCTTAAATCTAGAGGATCCTTCTGCCAGAACAGTAATGTT<br>CTCCAGC                  | pTG257 construct, reverse                                 |
| Rev <i>lysC</i> 200cd-RBS-<br>GFP      | CTCCTTCTTAAATCTAGAGGATCCCACGGCCAAGCGTCTGTTGTA<br>C                        | pTG276 construct, reverse                                 |
| Rev <i>lysC</i> 300cd-RBS-<br>GFP      | CTCCTTCTTAAATCTAGAGGATCCGAACAGCGGCGGATTTTCAG<br>TTTTATTG                  | pTG277 construct, reverse                                 |
| Rev <i>lysC</i> 400cd-RBS-<br>GFP      | CTCCTTCTTAAATCTAGAGGATCCCATGCGAATGTTGAACGGTT<br>CCAGTAC                   | pTG278 construct, reverse                                 |
| Fwd RBS-GFP on<br>pUA66                | GGATCCTCTAGATTTAAGAAGGAGATATACATATGAG                                     | pUA66 backbone amplification,<br>forward                  |
| Rev backbone pUA66+<br>lacUV5 overhang | GCATAAAGTGTAAGCCTGGGGTGCCCGTGAAGACGAAAGGGC<br>CTCGTG                      | pUA66 backbone amplification,<br>reverse                  |
| Fwd sequencing on<br>pUA66             | CTTCCCAACCTTACCAGAGGGCG                                                   | Plasmid sequencing                                        |
| Rev sequencing on<br>pUA66             | GCGGCGGATTTGTCCTACTCAG<br>GTGGGTGCACTGTCTAAAGGTC                          | Plasmid sequencing                                        |
| Fwd <i>rho</i> (AK149)                 | GTGGGTGCACTGTCTAAAGGTC                                                    | <i>rho</i> locus check, forward                           |
| Rev <i>rho</i> (AK151)                 | CATCTCGGTTACTTCTTCCGGAC                                                   | <i>rho</i> locus check, reverse                           |
|                                        |                                                                           |                                                           |
| <b>qPCR primers</b>                    |                                                                           |                                                           |
| Fwd <i>gyrA</i>                        | CTAATCCGTGGCAGCTGGGC                                                      | <i>gyrA</i> amplification, forward                        |
| Rev <i>gyrA</i>                        | ATCACGCACGCCGAACCTCTG                                                     | <i>gyrA</i> amplification, reverse                        |
| Fwd <i>rpoZ</i>                        | TGGCACGCGTAACTGTTTCAGG                                                    | <i>rpoZ</i> amplification, forward                        |
| Rev <i>rpoZ</i>                        | CCGCCTACCTGCATCTGACG                                                      | <i>rpoZ</i> amplification, reverse                        |
| Fwd <i>rssA</i>                        | CGGTTGACCTGCAGCAGAT                                                       | <i>rssA</i> amplification, forward                        |
| Rev <i>rssA</i>                        | CGCATGCCACGGCAGAGAAT                                                      | <i>rssA</i> amplification, reverse                        |
| Fwd <i>gfp</i>                         | GGAGTTGTCCCAATTCTTGTGAATTAGATGG                                           | <i>gfp</i> amplification, forward                         |
| Rev <i>gfp</i>                         | GTGCAAATAAATTTAAGGGTAAGTTTCCGTATGTTG                                      | <i>gfp</i> amplification, reverse                         |
| Fwd <i>lysC</i>                        | CCATGAACCGCAGCGCTGATATTG                                                  | <i>lysC</i> amplification, forward                        |
| Rev <i>lysC</i>                        | CCTTCAGCTAAAGCGACCAGCAG                                                   | <i>lysC</i> amplification, reverse                        |
|                                        |                                                                           |                                                           |
| <b>ChIP-qPCR primers</b>               |                                                                           |                                                           |
| Fwd pBAD                               | CCATAGCATTTTTATCCA                                                        | pBAD promoter amplification,<br>forward                   |
| Rev pBAD                               | AGAAGAGGCGCGTTG                                                           | pBAD promoter, reverse                                    |
| Fwd C3                                 | GCGCTGATATTGTGCTTT                                                        | <i>lysC</i> C3 amplification, forward                     |
| Rev C3                                 | GCTGAAGGACTGGAACCT                                                        | <i>lysC</i> C3 amplification, reverse                     |
| Fwd C5                                 | TACGCTGGTGTGCAATAA                                                        | <i>lysC</i> C5 amplification, forward                     |
| Rev C5                                 | CTCTGCTCACTTTGCACA                                                        | <i>lysC</i> C5 amplification, reverse                     |

|        |                    |                                       |
|--------|--------------------|---------------------------------------|
| Fwd C6 | AGGTGGAAGAAGGTCTGG | <i>lysC</i> C6 amplification, forward |
| Rev C6 | TATTCGGCGTACTGGAAC | <i>lysC</i> C6 amplification, reverse |

### Supplemental References

- Bastet L, Chauvier A, Singh N, Lussier A, Lamontagne A-MM, Prévost K, Massé E, Wade JT, Lafontaine DA. 2017. Translational control and Rho-dependent transcription termination are intimately linked in riboswitch regulation. *Nucleic Acids Res* **45**: 7474–7486.  
<http://www.ncbi.nlm.nih.gov/pubmed/28520932>.
- Caron M-P, Bastet L, Lussier A, Simoneau-Roy M, Massé E, Lafontaine DA. 2012. Dual-acting riboswitch control of translation initiation and mRNA decay. *Proceedings of the National Academy of Sciences* **109**: E3444-53.  
<http://www.ncbi.nlm.nih.gov/pubmed/23169642>.
- Zaslaver A, Bren A, Ronen M, Itzkovitz S, Kikoin I, Shavit S, Liebermeister W, Surette MG, Alon U. 2006. A comprehensive library of fluorescent transcriptional reporters for *Escherichia coli*. *Nat Methods* **3**: 623–8.
